# Supplementary material for: Structural evolution of carbon dots during low temperature pyrolysis
Source: Royal Society of Chemistry journal article supplement (doi:10.1039/d1nr07015k), 2021-12-25
Supplement: d1nr07015k3.pdf [file d1nr07015k3.pdf]

# Structural Evolution of Carbon Dots During Low Temperature Pyrolysis

Hui Luo,<sup>a,b</sup> Leonardo Lari,<sup>c</sup> Hyunjeong Kim,<sup>d</sup> Servann Hérou,<sup>a</sup> Liviu Cristian Tanase,<sup>e</sup> Vlado K Lazarov,<sup>c</sup> and Maria-Magdalena Titirici<sup>a\*</sup>

Corresponding author: \*Maria-Magdalena Titirici [m.titirici@imperial.ac.uk](mailto:m.titirici@imperial.ac.uk)

## 1. Materials Preparation

The CDs were prepared by hydrothermal carbonisation of D-(+)-glucose. Briefly, the precursor was dissolved in water (4% w/v) and placed in a Teflon-lined, stainless steel autoclave, which underwent treatment at 200 °C for 12 h. The obtained yellow solution was centrifuged at 10,000 rpm for 10 min to separate the liquid containing fluorescent CDs from the micro-spheres. The liquid phase containing CDs was then filtered using standard syringe filters and freeze-dried to obtain solid CDs, which are named HTC-CDs. These CDs are then pyrolyzed for two hours under different temperature in N<sub>2</sub> atmosphere, the products are named as CDs\_350\_N<sub>2</sub>, CDs\_550\_N<sub>2</sub> and CDs\_750\_N<sub>2</sub>, respectively.

## 2. Materials Characterisation

*Ex situ* Transmission electron microscopic (TEM) and high resolution TEM (HRTEM) images were obtained on a Jeol JEM 2010 microscope. The X-ray diffraction (XRD) patterns were performed using Panalytical Xpert Pro diffractometer with Cu-K $\alpha$  radiation. Raman spectra were obtained with a Renishaw InVia Reflex Raman spectrometer with a wavelength of 633 nm. The Synchrotron X-ray total scattering experiment was carried out at BL22XU<sup>1</sup> at Spring-8 using the rapid acquisition pair distribution function (RA-PDF) technique.<sup>2</sup> CD samples were packed in polyimide capillaries with the inner diameter of 1.4 mm. X-ray wavelength was 0.17892 Å (E=69.296 keV), and the sample to detector distance was set to be 500 mm. For data

acquisition, 75 frames of 8 second data were collected for each sample to decrease signal-to-noise ratio. The signal from an empty container (a polyimide capillary) was subtracted from the raw data, and various other corrections were made.<sup>3</sup> The X-ray PDFs were obtained by a sine Fourier transformation of the powder diffraction data according to the equation

$$G(r) = \frac{2}{\pi} \int_{Q_{\min}}^{Q_{\max}} Q[S(Q) - 1] \sin(Qr) dQ$$

where  $Q$  is the magnitude of the momentum transfer and  $S(Q)$  is the total scattering structure function.<sup>3</sup> Because of the unfavorable signal-to-noise ratio at the high- $Q$  regions,  $Q[S(Q)-1]$  was truncated at  $Q_{\max}=12.5 \text{ \AA}^{-1}$  before the transformation. The program PDFgetX<sup>24</sup> was used for obtaining the X-ray PDFs. For PDF calculation DiffPy-CMI<sup>5</sup> programs was used.

The Fourier transformed infrared spectra (FTIR) of CDs were recorded with freeze-dried powders by using a Bruker Tensor 27 instrument equipped with diamond lens attenuated total reflectance (ATR) module in the range from  $4000 \text{ cm}^{-1}$  to  $400 \text{ cm}^{-1}$ . X-ray photoelectron spectroscopic (XPS) measurements on all CDs were performed using an AXIS Ultra DLD (Kratos Surface Analysis) setup equipped with an  $180^\circ$  hemispherical analyser, using Al  $K_{\alpha 1}$  ( $1486.74 \text{ eV}$ ) radiation from a monochromatized X-Ray source at operating power of  $300\text{W}$  ( $15 \text{ kV} \times 20 \text{ mA}$ ). The time-resolved *in-situ* TEM experiment was carried out on a double aberration corrected JEOL JEM 2200FS TEM/STEM *in-house* modified for Environmental *in-situ* gas experiments,<sup>1</sup> and operating at  $200 \text{ kV}$  in TEM mode. The microscope is equipped with an *in-column* Omega type electron energy loss filter, and with a DENS Solutions Wildfire heating holder with MEMS chips to support and heat up the materials. The MEMS chip contains a resistance to produce heat when electricity is applied. In the middle of the chips a series of small windows with silicon nitride membranes are used for imaging, with a thickness of around  $100 \text{ nm}$ . The sample was heated at  $20 \text{ }^\circ\text{C}/\text{min}$  under  $\text{N}_2$  atmosphere until  $750 \text{ }^\circ\text{C}$  was reached with holding at  $350 \text{ }^\circ\text{C}$ ,  $550 \text{ }^\circ\text{C}$  to observe the structural changes at those specific

temperatures. Pressure at the sample was fixed at 2 Pa throughout the experiment. The UV-Vis measurements were performed using Perkin Elmer Lambda LS 35 instrument. The CD samples were dispersed in DI water to obtain a dilute solution (0.1 mg/mL). The same solutions were also measured for PL using Perkin Elmer LS55 instrument with excitation of 350 nm. The solid-state PL measurement was done using two excitation lasers of 325 nm and 442 nm, respectively.

### 3. Supporting Figures and tables

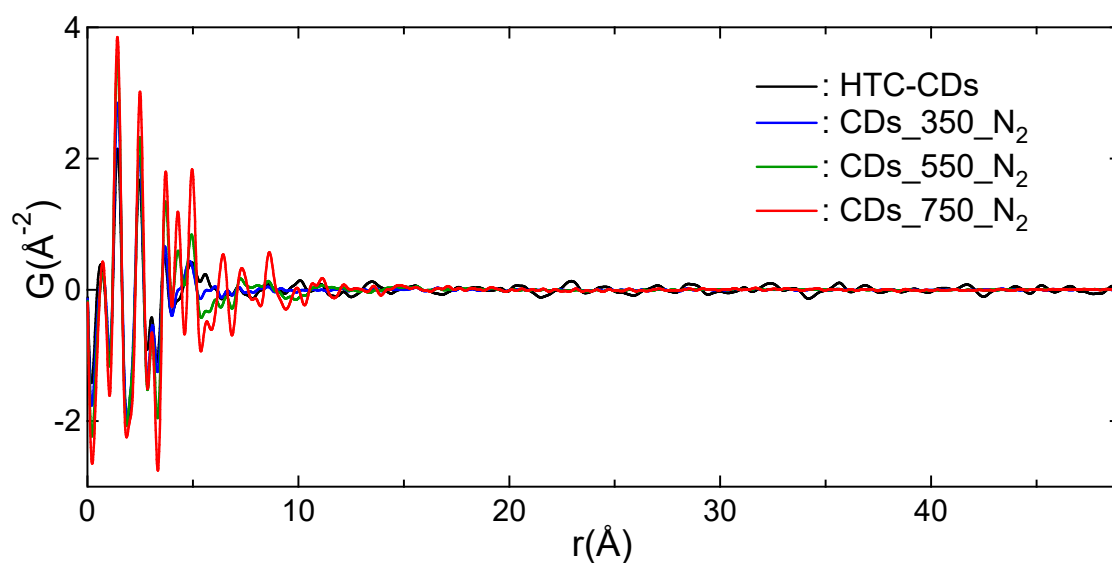

**Figure S1.** PDF spectra of all CD samples on a longer  $r$  range.

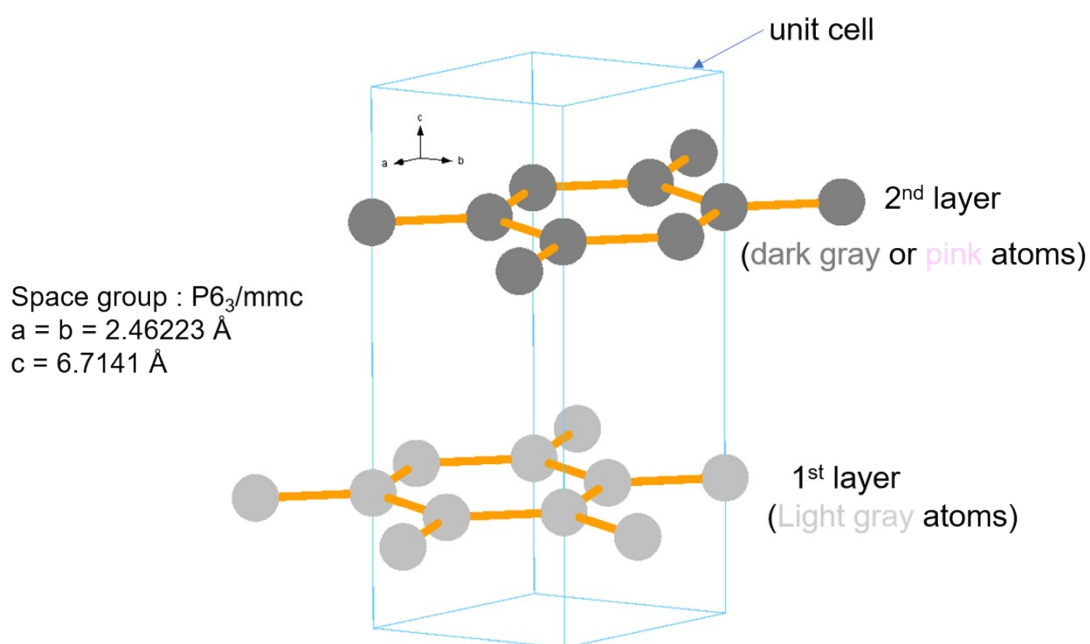

**Figure S2.** Graphite model based on which small aromatic cluster models shown in Figure 3 (b)-(d) were made to reproduce the experimental PDF spectra of all CD samples.

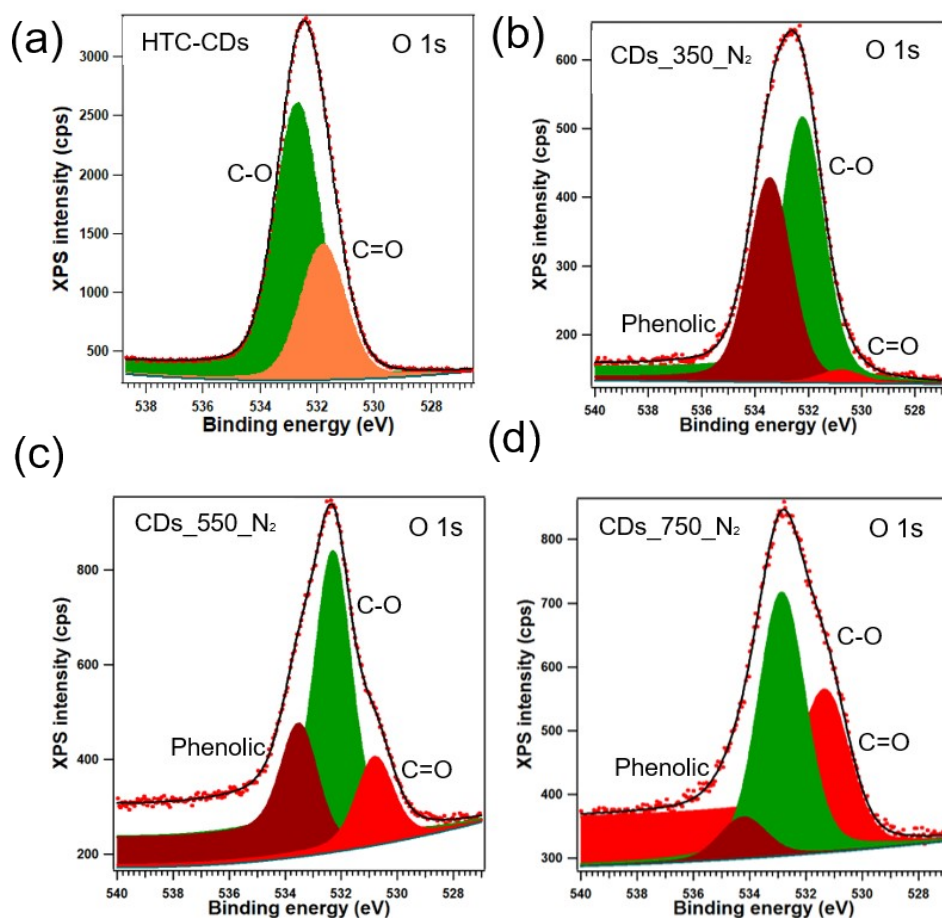

**Figure S3.** O 1s XPS spectra of CDs: (a) HTC-CDs, (b) CDs\_350\_N<sub>2</sub>, (c) CDs\_550\_N<sub>2</sub>, (d) CDs\_750\_N<sub>2</sub>.

**Table S1.** Chemical composition and O 1s binding energy in different CDs (from XPS).

| Samples               | C=O/eV | C-O/eV | Phenolic/eV |
|-----------------------|--------|--------|-------------|
| CD_350_N <sub>2</sub> | 530.78 | 532.2  | 533.45      |
| CD_550_N <sub>2</sub> | 530.82 | 532.29 | 533.5       |
| CD_750_N <sub>2</sub> | 531.26 | 532.88 | 534.25      |

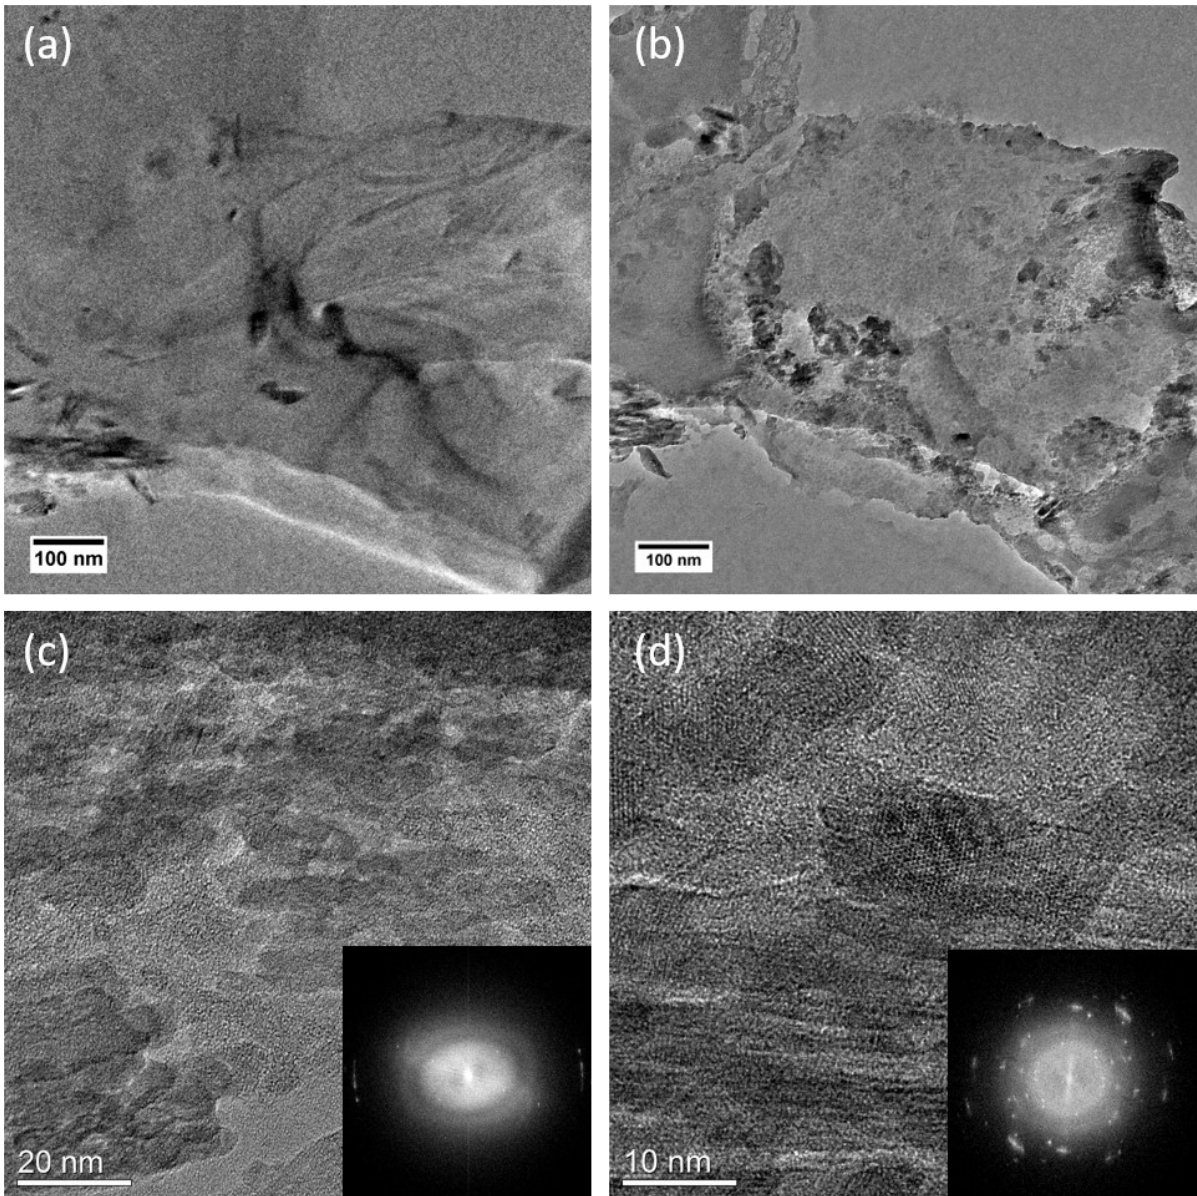

**Figure S4.** *in situ* TEM images of carbon matrix containing CDs at RT (a, c) and 750 °C (b, d).

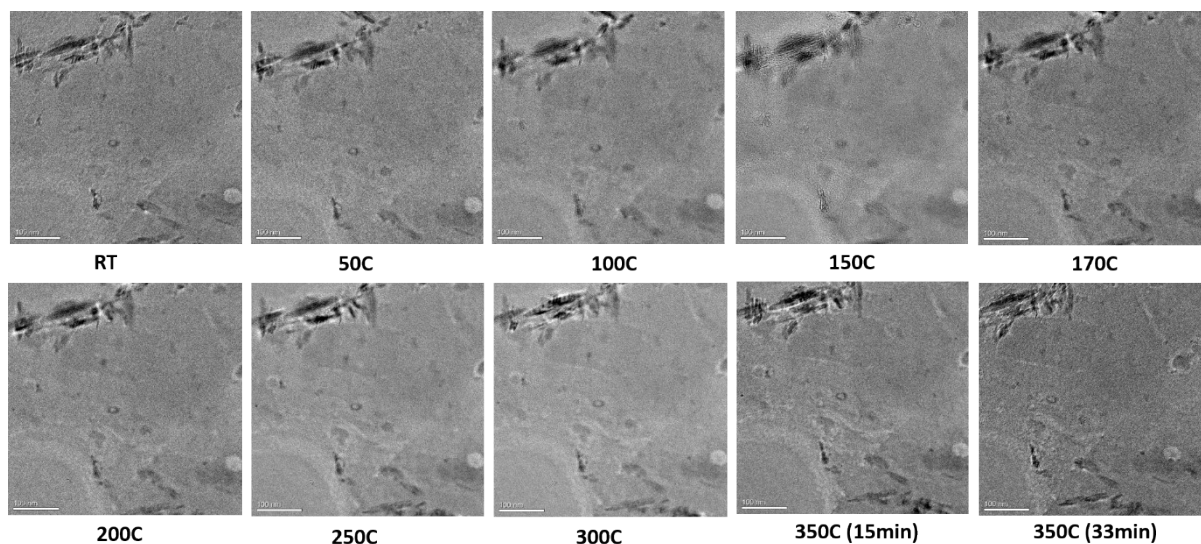

**Figure S5.** *in situ* TEM images of a temperature series from RT to 350 °C with a ramping rate at 20 °C/min (all scale bars are 100 nm).

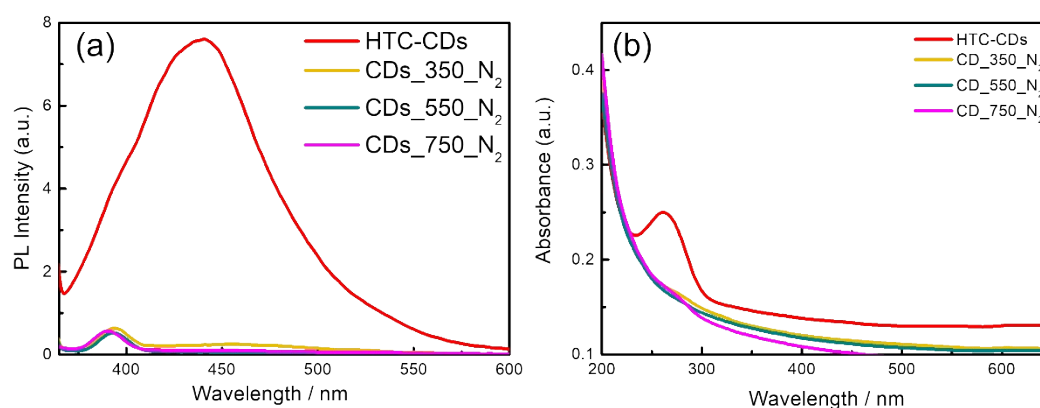

**Figure S6.** (a) PL and (b) UV-Vis spectra of all CD samples in diluted solution. the excitation wavelength for PL spectra are 355 nm.

## References

- (1) Watanuki, T.; Machida, A.; Ikeda, T.; Ohmura, A.; Kaneko, H.; Aoki, K.; Sato, T. J.; Tsai, A. P. Development of a Single-Crystal X-ray Diffraction System for Hydrostatic-Pressure and Low-Temperature Structural Measurement and Its Application to the Phase Study of Quasicrystals. *Philos. Mag.* **2007**, 87, 2905-2911.
- (2) Chupas, P. J.; Qiu, X.; Hanson, J. C.; Lee, P. L.; Grey, C. P.; Billinge, S. J. L. J. Rapid-Acquisition Pair Distribution Function (RA-PDF) Analysis. *Appl. Crystallogr.* **2003**, 36, 1342-1347.
- (3) Egami, T.; Billinge, S. J. L. *Underneath the Bragg Peaks: Structural Analysis of Complex Materials*; Pergamon Press Elsevier: Oxford, England, 2003.

(4) Qiu, X.; Thompson, J. W.; Billinge, S. J. L. PDFgetX2: A GUI Driven Program to Obtain the Pair Distribution Function from X-ray Powder Diffraction Data. *J. Appl. Crystallogr.* **2004**, 37, 678.

(5) Juhás, P.; Farrow, C. L.; Yang, X.; Knox, K. R.; Billinge, S. J. L. Complex modeling: a strategy and software program for combining multiple information sources to solve ill posed structure and nanostructure inverse problems. *Acta Crystallogr. A* **2015**, 71, 562-568.
